# Supplementary material for: Ru doping induces the construction of a unique core–shell microflower self-supporting electrocatalyst for highly efficient overall water splitting
Source: Royal Society of Chemistry journal article supplement (doi:10.1039/d1dt02341a), 2021-01-01
Supplement: d1dt02341a1.pdf [file d1dt02341a1.pdf]

## Supporting Information

### **Ru doping induces the construction of the unique core-shell microflower self-supporting electrocatalyst for highly efficient overall water splitting**

Lei Ye <sup>a</sup>, Yeqing Zhang <sup>a</sup>, Buwen Guo <sup>c</sup>, Duanlin Cao <sup>a</sup>, Yaqiong Gong <sup>a,b,\*</sup>

*a School of Chemical Engineering and Technology, North University of China, Taiyuan 030051, PR China.*

*b State Key Laboratory of Physical Chemistry of Solid Surfaces, Xiamen University, Xiamen 361005, PR China.*

*c School of management, Xizang Minzu University, Xianyang 712082, PR China.*

\* Email: [gyq@nuc.edu.cn](mailto:gyq@nuc.edu.cn) (Yaqiong Gong)

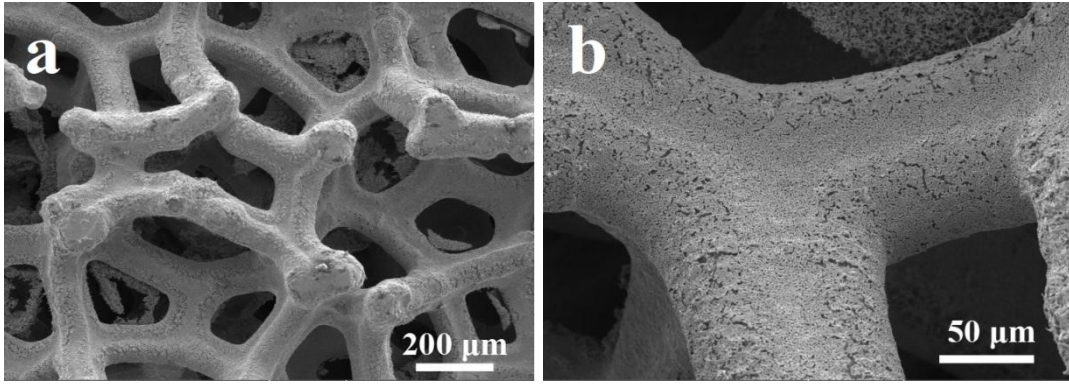

**Fig. S1.** SEM images of IF.

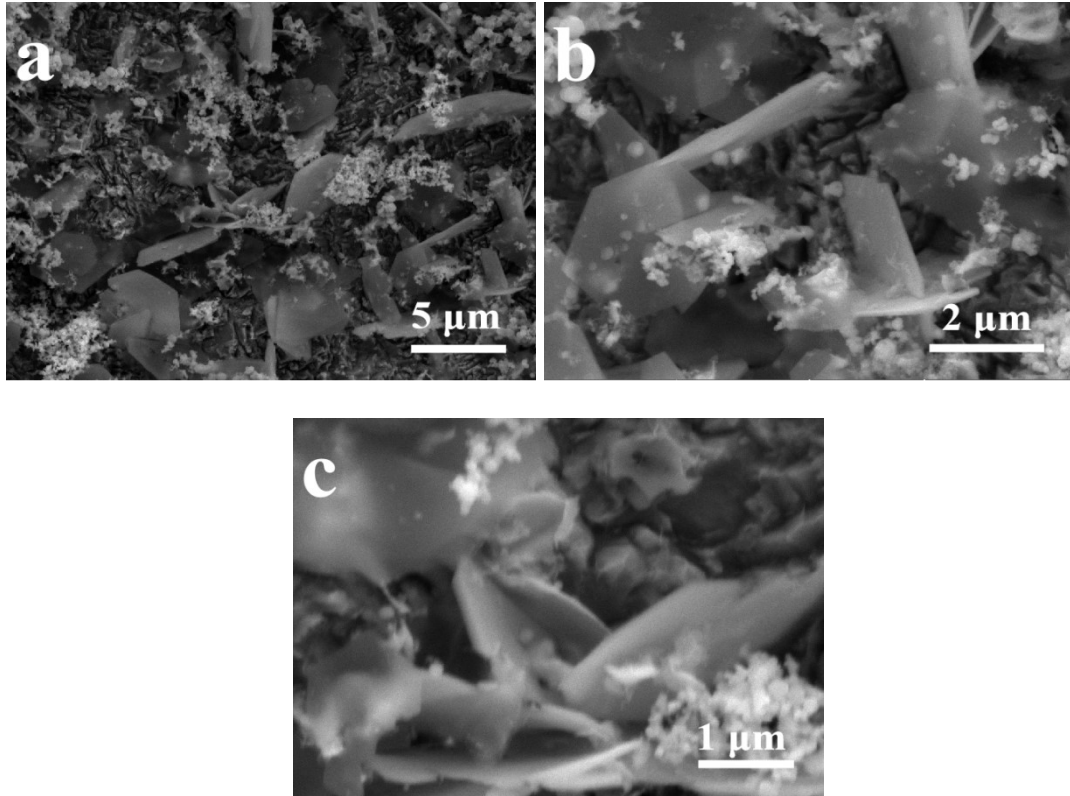

**Fig. S2.** SEM images of Fe-LDH/IF.

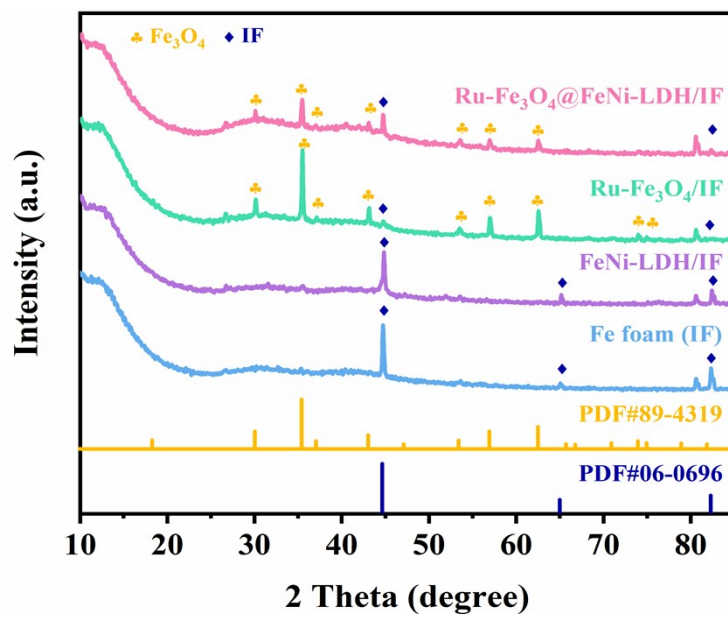

Fig. S3. XRD pattern of different samples.

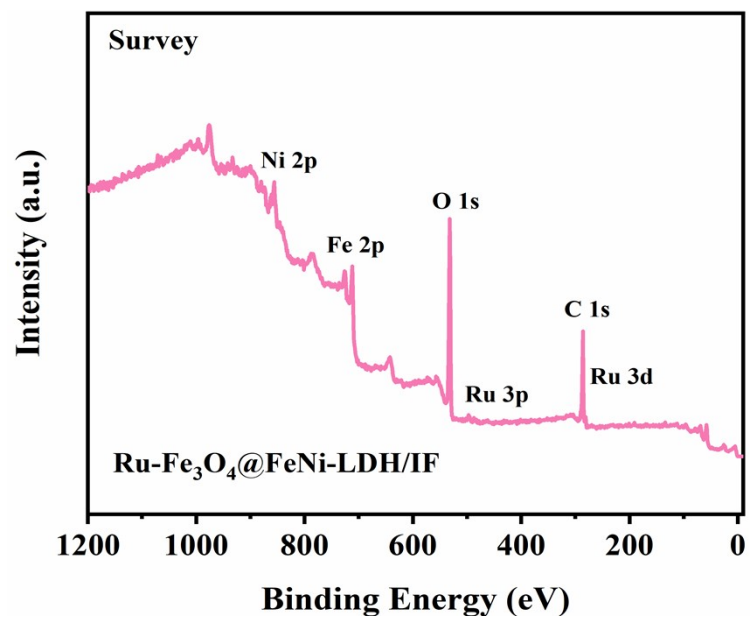

**Fig. S4.** XPS survey spectrum of Ru-Fe<sub>3</sub>O<sub>4</sub>@FeNi-LDH/IF.

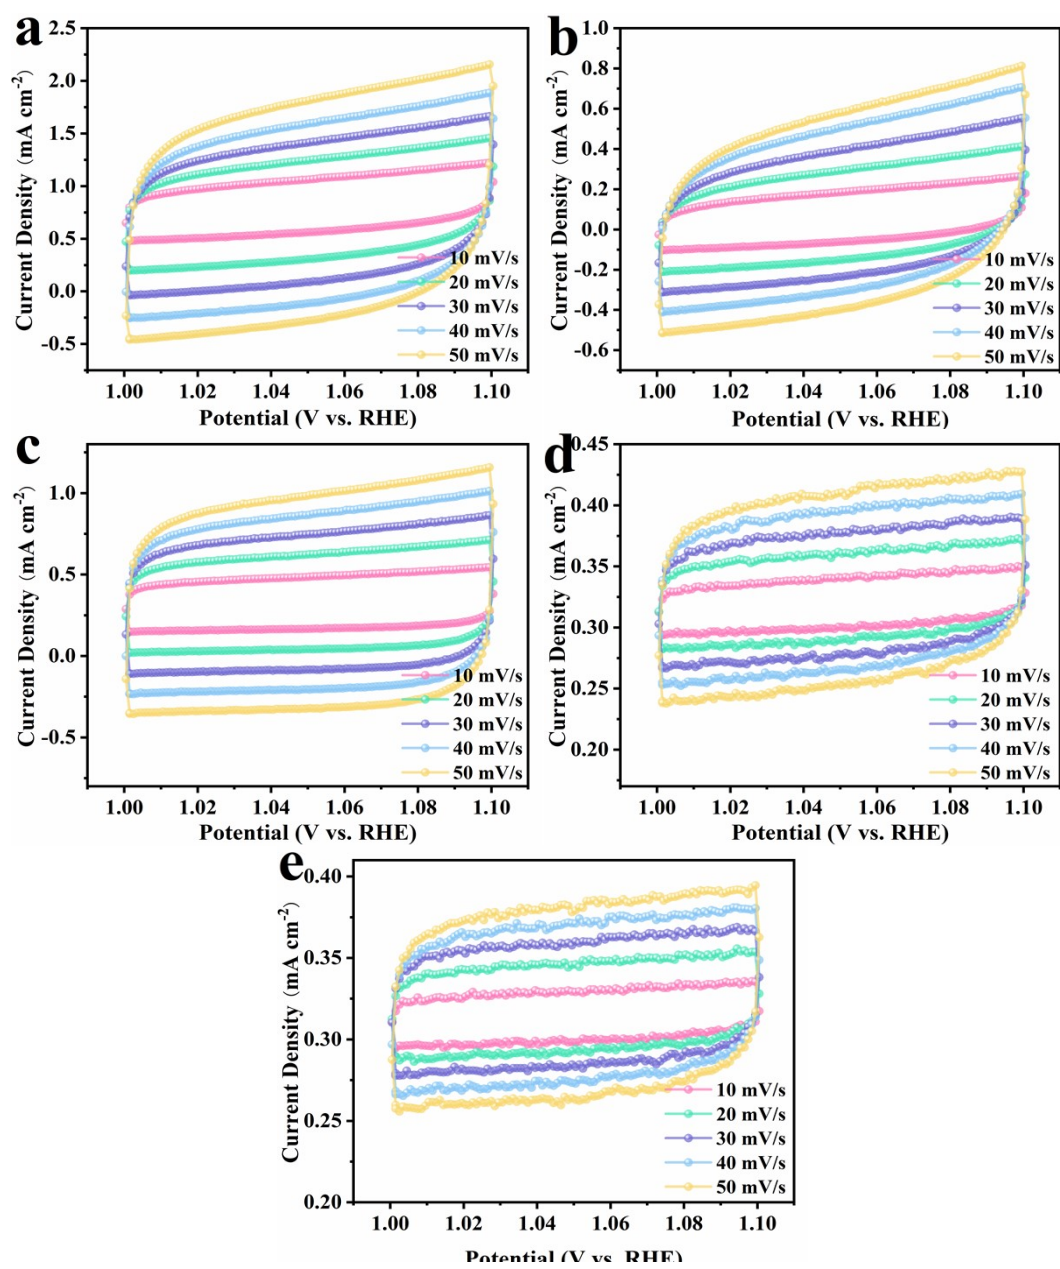

**Fig. S5.** Cyclic voltammetry curves of (a) Ru-Fe<sub>3</sub>O<sub>4</sub>@FeNi-LDH/IF, (b) Ru-Fe<sub>3</sub>O<sub>4</sub>/IF, (c) FeNi-LDH/IF, (d) Fe-LDH/IF and (e) IF toward OER

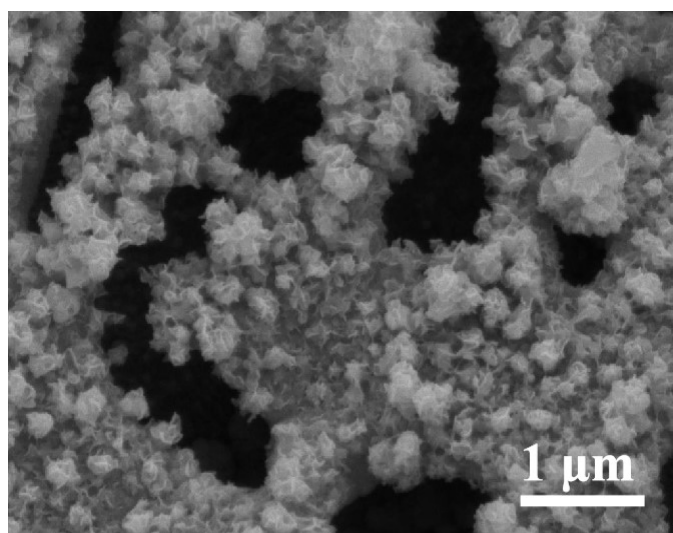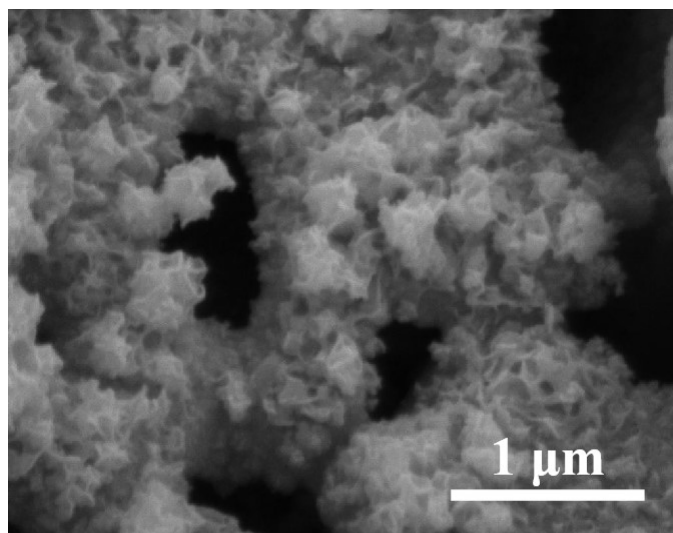

**Fig. S6.** SEM images of Ru-Fe<sub>3</sub>O<sub>4</sub>@FeNi-LDH/IF after 25 hours OER stability measurements.

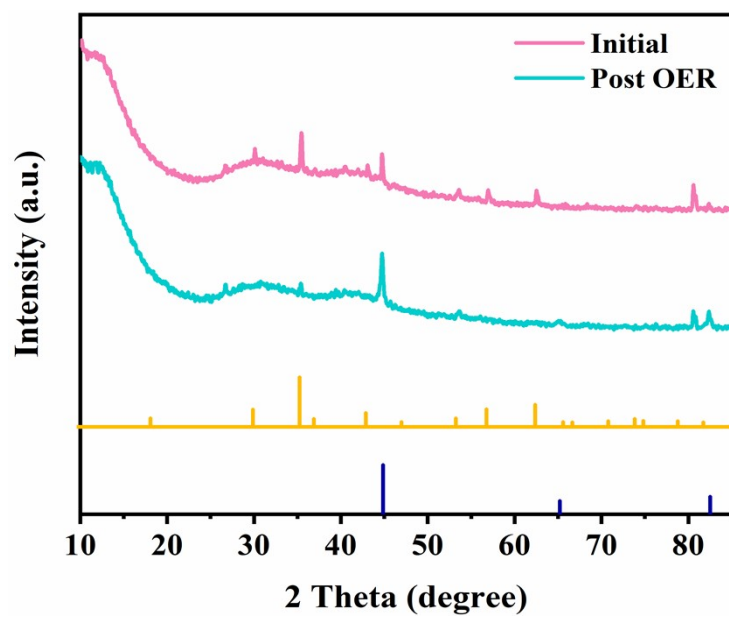

**Fig. S7.** XRD pattern of Ru-Fe<sub>3</sub>O<sub>4</sub>@FeNi-LDH/IF before and after OER stability test.



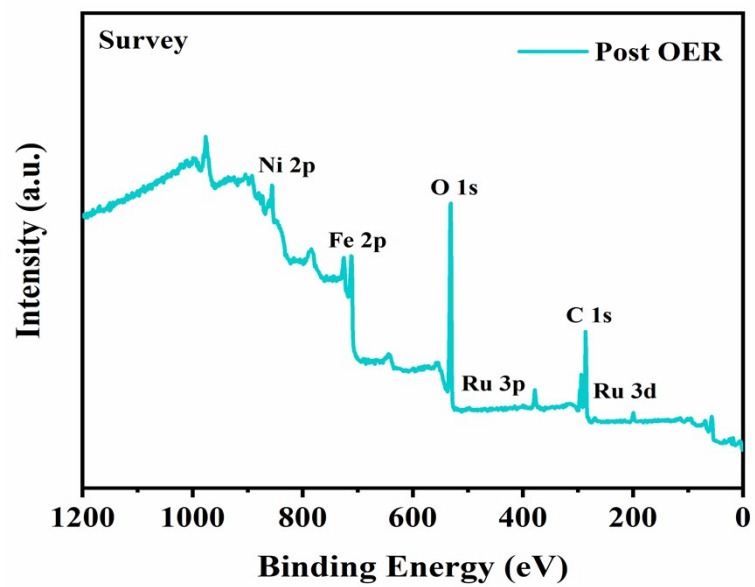

**Fig. S8.** XPS survey spectrum of Ru-Fe<sub>3</sub>O<sub>4</sub>@FeNi-LDH/IF after OER stability test.

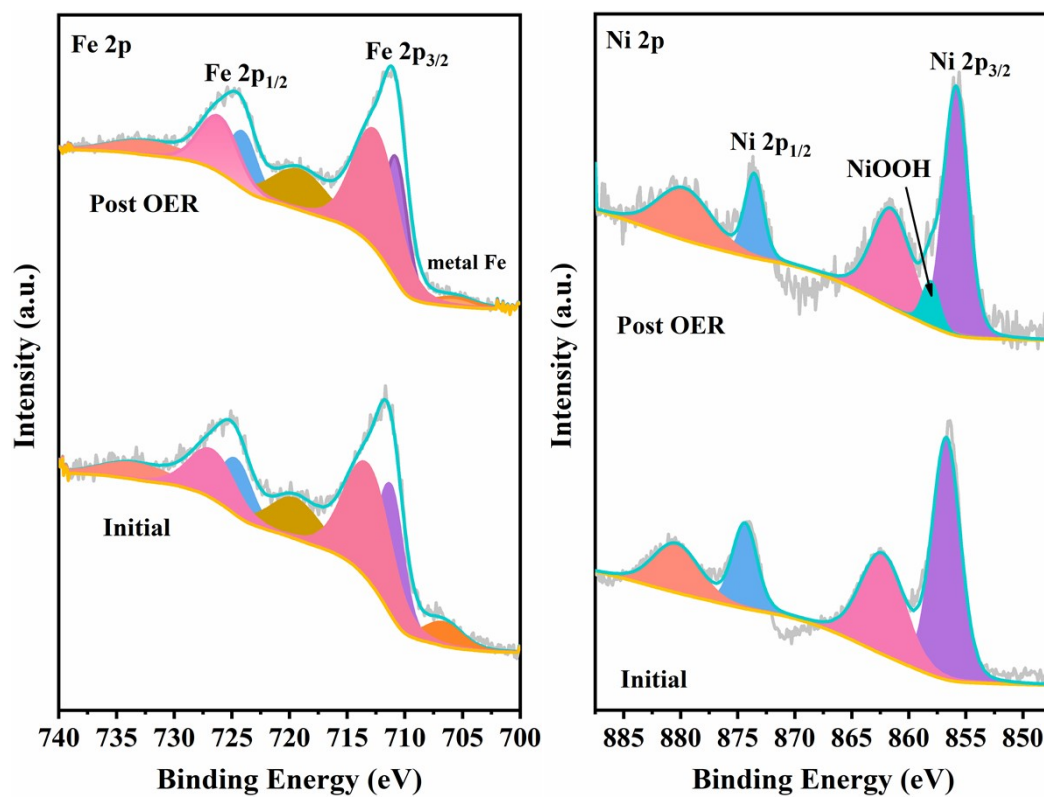

**Fig. S9.** Comparison of XPS spectra before and after OER stability test.

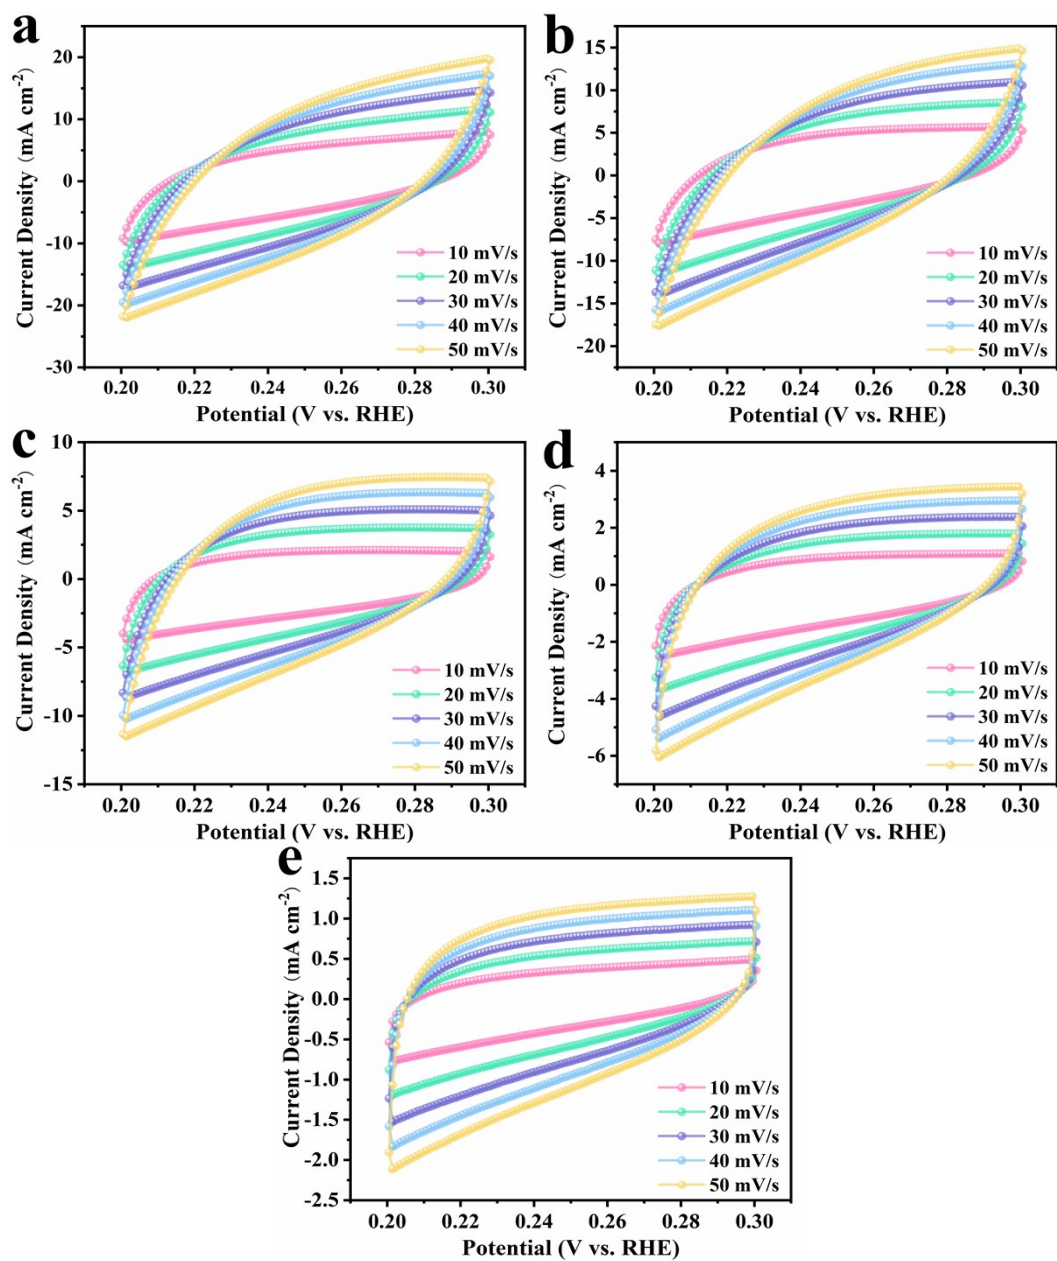

**Fig. S10.** Cyclic voltammety curves of (a) Ru-Fe<sub>3</sub>O<sub>4</sub>@FeNi-LDH/IF, (b) Ru-Fe<sub>3</sub>O<sub>4</sub>/IF, (c) FeNi-LDH/IF, (d) Fe-LDH/IF and (e) IF toward HER.

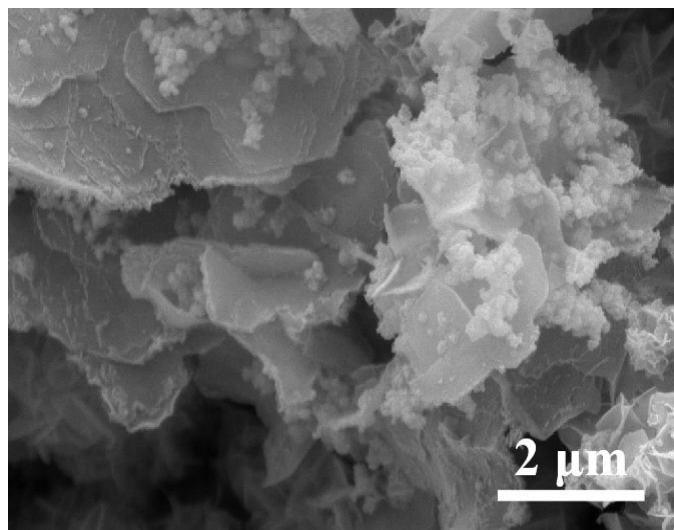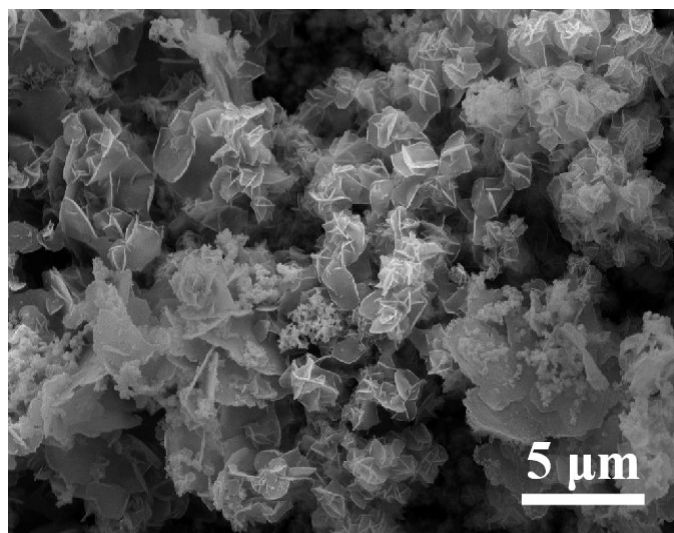

**Fig. S11.** SEM images of Ru-Fe<sub>3</sub>O<sub>4</sub>@FeNi-LDH/IF after 25 hours HER stability measurements.

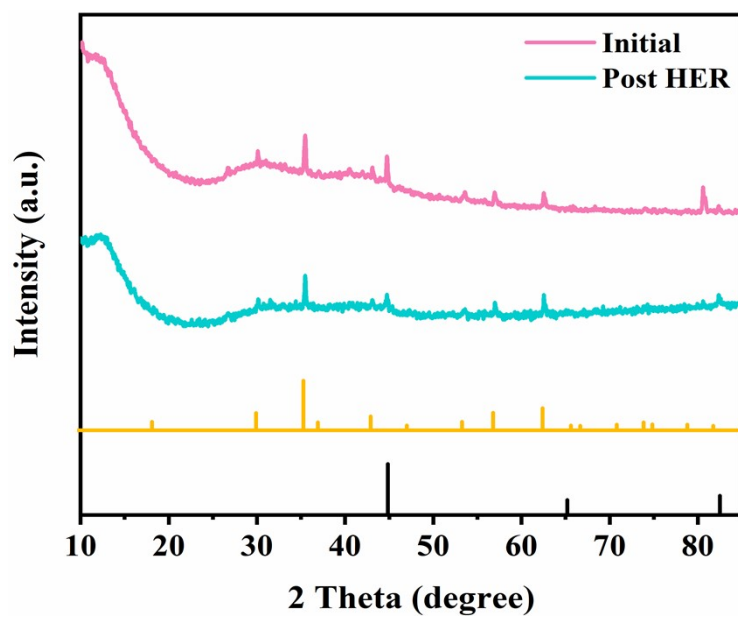

**Fig. S12.** XRD pattern of Ru-Fe<sub>3</sub>O<sub>4</sub>@FeNi-LDH/IF before and after HER stability test.

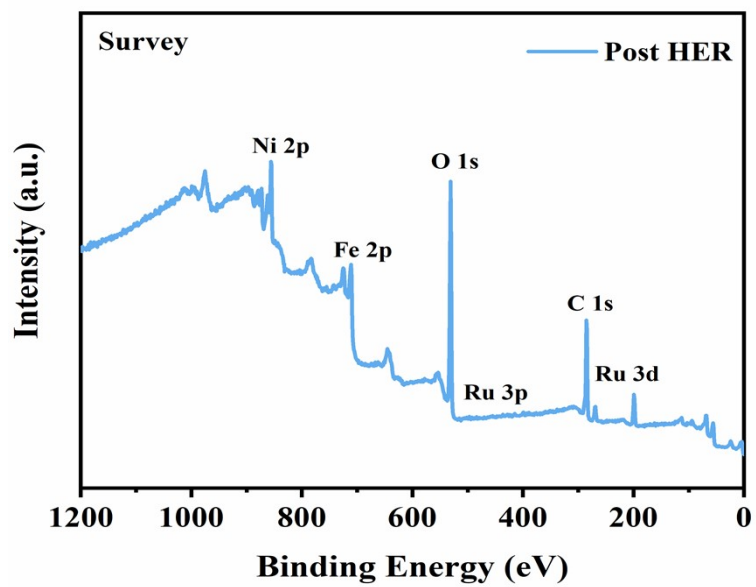

**Fig. S13.** XPS survey spectrum of Ru-Fe<sub>3</sub>O<sub>4</sub>@FeNi-LDH/IF after HER stability test.

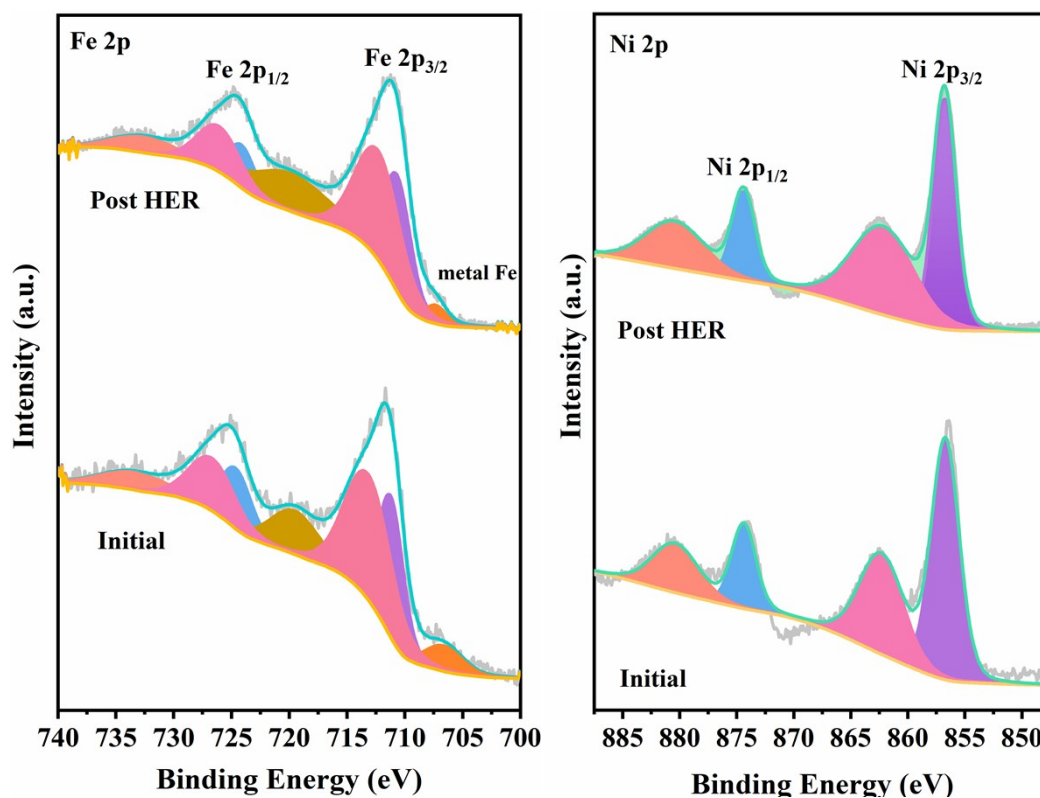

**Fig. S14.** Comparison of XPS spectra before and after HER stability test.

**Fig. S15.** Digital photograph of the experimental measurement of the gas production of Ru-Fe<sub>3</sub>O<sub>4</sub>@FeNi-LDH/IF electrocatalyst at a current density of 100 mA·cm<sup>-2</sup>.





**Table S1** Comparison of OER activity between Ru-Fe<sub>3</sub>O<sub>4</sub>@FeNi-LDH/IF and other recently reported non noble metal catalysts.

| Catalysts                                      | Overpotential (V vs. RHE)     | Reference |
|------------------------------------------------|-------------------------------|-----------|
| Ru-Fe <sub>3</sub> O <sub>4</sub> @FeNi-LDH/IF | 189 mV@10 mA cm <sup>-2</sup> | This work |
| Ru SAs/AC-FeCoNi                               | 205 mV@10 mA cm <sup>-2</sup> | 1         |
| Ni(OH) <sub>2</sub> @NiSe <sub>2</sub>         | 225 mV@10 mA cm <sup>-2</sup> | 2         |
| NiFe LDH@NiCoP/NF                              | 220 mV@10 mA cm <sup>-2</sup> | 3         |
| Co(OH) <sub>2</sub> /CNTs-IrCl-<br>0.075       | 230 mV@10 mA cm <sup>-2</sup> | 4         |
| NiFeCo LDH                                     | 200 mV@10 mA cm <sup>-2</sup> | 5         |
| CoFe@NiFe-100/NF                               | 220 mV@10 mA cm <sup>-2</sup> | 6         |
| NiFeP@N-CS                                     | 216 mV@10 mA cm <sup>-2</sup> | 7         |
| Co-C@NiFe LDH                                  | 249mV@10 mA cm <sup>-2</sup>  | 8         |

**Table S2** Comparison of HER activity between Ru-Fe<sub>3</sub>O<sub>4</sub>@FeNi-LDH/IF and other recently reported non noble metal catalysts.

| Catalysts                                         | Overpotential (V vs. RHE)     | Reference |
|---------------------------------------------------|-------------------------------|-----------|
| Ru-Fe <sub>3</sub> O <sub>4</sub> @FeNi-LDH/IF    | 104 mV@10 mA cm <sup>-2</sup> | This work |
| NiFe LDH@NiCoP/NF                                 | 120mV@10 mA cm <sup>-2</sup>  | 3         |
| NiFeP@N-CS                                        | 186 mV@10 mA cm <sup>-2</sup> | 7         |
| Fe <sub>2</sub> O <sub>3</sub> /NiSe <sub>2</sub> | 132 mV@10 mA cm <sup>-2</sup> | 9         |
| Ni-GF/VC                                          | 128 mV@10 mA cm <sup>-2</sup> | 10        |
| CoV/ CF-CWs                                       | 118 mV@10 mA cm <sup>-2</sup> | 11        |
| Ni-P/Ni/NF                                        | 129 mV@10 mA cm <sup>-2</sup> | 12        |
| WP2 NW/NF                                         | 130 mV@10 mA cm <sup>-2</sup> | 13        |
| 0.05Mn-MoP NSs                                    | 198 mV@10 mA cm <sup>-2</sup> | 14        |

**Table S3.** Comparison of overall water splitting performance for the Ru-Fe<sub>3</sub>O<sub>4</sub>@FeNi-LDH/IF catalyst with other reported electrocatalysts in 1 M KOH.

| Catalysts                                                                | Overpotential (V vs. RHE)     | Reference |
|--------------------------------------------------------------------------|-------------------------------|-----------|
| Ru-Fe <sub>3</sub> O <sub>4</sub> @FeNi-LDH/IF                           | 1.52 V@10 mA cm <sup>-2</sup> | This work |
| U-Fe-β-Ni(OH) <sub>2</sub> @/NF-2                                        | 1.58 V@10 mA cm <sup>-2</sup> | 15        |
| Fe-FVO-60-act                                                            | 1.58 V@10 mA cm <sup>-2</sup> | 16        |
| Fe-Ni <sub>2</sub> P/MoS <sub>x</sub> /NF                                | 1.61 V@10 mA cm <sup>-2</sup> | 17        |
| Ni/Ni(OH) <sub>2</sub>                                                   | 1.68 V@10 mA cm <sup>-2</sup> | 18        |
| Ni@NiFe LDH                                                              | 1.53 V@10 mA cm <sup>-2</sup> | 19        |
| Ni <sub>2</sub> P-Fe <sub>2</sub> P/NF                                   | 1.56 V@10 mA cm <sup>-2</sup> | 20        |
| V-CoP@ a-CeO <sub>2</sub>                                                | 1.56 V@10 mA cm <sup>-2</sup> | 21        |
| Fe-Ni <sub>3</sub> P <sub>4</sub> /NiFeOH-350                            | 1.55 V@10 mA cm <sup>-2</sup> | 22        |
| NiFeP@N-CS                                                               | 1.63 V@10 mA cm <sup>-2</sup> | 23        |
| CoFe@NiFe/NF                                                             | 1.59 V@10 mA cm <sup>-2</sup> | 24        |
| Ru-NiFeP/NF                                                              | 1.47 V@10 mA cm <sup>-2</sup> | 25        |
| WP <sub>2</sub> NW/NF                                                    | 1.65 V@10 mA cm <sup>-2</sup> | 26        |
| NiFe-LDH/NiCo <sub>2</sub> O <sub>4</sub>                                | 1.60 V@10 mA cm <sup>-2</sup> | 27        |
| Ni <sub>1</sub> Fe <sub>10</sub> -LDH@Ni <sub>3</sub> S <sub>2</sub> /NF | 1.65 V@10 mA cm <sup>-2</sup> | 28        |

### Supplementary References

[1] Y. Hu, G. Luo, L. Wang, X. Liu, Y. Qu, Y. Zhou, F. Zhou, Z. Li, Y. Li, T. Yao,

- C. Xiong, B. Yang, Z. Yu and Y. Wu, *Adv. Energy Mater.*, 2020, **11**, 2002816.
- [2] S. F. Zai, X. Y. Gao, C. C. Yang and Q. Jiang, *Adv. Energy Mater.*, 2021, DOI: 10.1002/aenm.202101266.
- [3] H. Zhang, X. Li, A. Hähnel, V. Naumann, C. Lin, S. Azimi, S. L. Schweizer, A. W. Maijenburg and R. B. Wehrspohn, *Adv. Funct. Mater.*, 2018, **28**, 1706847.
- [4] Y. Huang, G. Wei, J. He, C. An, M. Hu, M. Shu, J. Zhu, S. Yao, W. Xi, R. Si, Z.-M. Zhang and C. An, *Appl. Catal. B Environ.*, 2020, **279**, 119398.
- [5] J. Lee, H. Jung, Y. S. Park, N. Kwon, S. Woo, N. C. S. Selvam, G. S. Han, H. S. Jung, P. J. Yoo, S. M. Choi, J. W. Han and B. Lim, *Appl. Catal. B Environ.*, 2021, **294**, 120246.
- [6] R. Yang, Y. Zhou, Y. Xing, D. Li, D. Jiang, M. Chen, W. Shi and S. Yuan, *Appl. Catal. B Environ.*, 2019, **253**, 131-139.
- [7] J. Hei, G. Xu, B. Wei, L. Zhang, H. Ding and D. Liu, *Appl. Surf. Sci.*, 2021, **549**, 149297.
- [8] W. Li, S. Chen, M. Zhong, C. Wang and X. Lu, *Chem. Eng. J.*, 2021, **415**, 128879.
- [9] Z. Shao, R. Liu, H. Xue, J. Sun, N. Guo, F. He and Q. Wang, *Chem. Eng. J.*, 2021, **416**, 129098.
- [10] C. Yang, R. Zhao, H. Xiang, J. Wu, W. Zhong, W. Li, Q. Zhang, N. Yang and X. Li, *Adv. Energy Mater.*, 2020, **10**, 2002260.
- [11] Z. Li, J. Yang, Z. Chen, C. Zheng, L. Q. Wei, Y. Yan, H. Hu, M. Wu and Z. Hu, *Adv. Funct. Mater.*, 2020, **31**, 2008822.
- [12] J. Zhang, Z. Zhang, Y. Ji, J. Yang, K. Fan, X. Ma, C. Wang, R. Shu and Y. Chen, *Appl. Catal. B Environ.*, 2021, **282**, 119609.
- [13] F. Meng, Y. Yu, D. Sun, L. Li, S. Lin, L. Huang, W. Chu, S. Ma and B. Xu, *Appl. Surf. Sci.*, 2021, **546**, 148926.
- [14] Z. Mu, T. Guo, H. Fei, Y. Mao, Z. Wu and D. Wang, *Appl. Surf. Sci.*, 2021, **551**,
- [15] X. Qiao, H. Kang, Y. Li, K. Cui, X. Jia, H. Liu, W. Qin, M. Pupucevski and G. Wu, *ACS Appl. Mater. Interfaces*, 2020, **12**, 36208-36219.
- [16] F. Nur Indah Sari, S. Abdillah, J.M. Ting, *Chem. Eng. J.*, 2021, **416**, 129165.

- [17]X.L. Zhang, C. Liang, X.Y. Qu, Y.F. Ren, J.J. Yin, W.J. Wang, M.S. Yang, W. Huang, X.C. Dong, *Adv. Mater. Interfaces*, 2020, **7**, 1901926.
- [18]D. Lim, S. Kim, N. Kim, E. Oh, S.E. Shim, S.H. Baeck, *ACS Sustainable Chem. Eng.*, 2020, **8**, 4431-4439.
- [19]Z. Cai, X. Bu, P. Wang, W. Su, R. Wei, J.C. Ho, J. Yang, X. Wang, *J. Mater. Chem. A*, 2019, **7**, 21722-21729.
- [20]L. Wu, L. Yu, F. Zhang, B. McElhenny, D. Luo, A. Karim, S. Chen, Z. Ren, *Adv. Funct. Mater.*, 2021, **31**, 2006484.
- [21]L. Yang, R. Liu, L. Jiao, *Adv. Funct. Mater.*, 30 (2020) 1909618.
- [22]C.F. Li, J.W. Zhao, L.J. Xie, J.Q. Wu, G.R. Li, *Appl. Catal. B Environ.*, 2021, **291**, 119987.
- [23]J. Hei, G. Xu, B. Wei, L. Zhang, H. Ding, D. Liu, *Appl. Surf. Sci.*, 2021, **549**, 149297.
- [24]R. Yang, Y. Zhou, Y. Xing, D. Li, D. Jiang, M. Chen, W. Shi, S. Yuan, *Appl. Catal. B*, 2019, **253**, 131-139.
- [25]Y. Lin, M. Zhang, L. Zhao, L. Wang, D. Cao, Y. Gong, *Appl. Surf. Sci.*, 2021, **536**, 147952.
- [26]F. Meng, Y. Yu, D. Sun, L. Li, S. Lin, L. Huang, W. Chu, S. Ma, B. Xu, T, *Appl. Surf. Sci.*, 2021, **546**, 148926.
- [27]J. Liu, J. Wang, B. Zhang, Y. Ruan, L. Lv, X. Ji, K. Xu, L. Miao, J. Jiang, *ACS Appl. Mater. Interfaces*, 2017, **9**, 15364-15372.
- [28]L. Ren, C. Wang, W. Li, R. Dong, H. Sun, N. Liu, B. Geng, *Electrochim. Acta*, 2019, **318**, 42-50.
